# Supplementary material
Source: ML conference proceedings conference paper supplement (https://proceedings.neurips.cc/paper_files/paper/2020/hash/645e6bfdd05d1a69c5e47b20f0a91d46-Abstract.html)
Supplement: Supplementary file [file 645e6bfdd05d1a69c5e47b20f0a91d46-Supplemental.pdf]

## A Further Preliminaries

For a sequence of vectors  $v_1, \dots, v_\ell$ , we let  $v_1 v_2 \dots v_\ell = v_1 \circ v_2 \circ \dots \circ v_\ell = \bigcirc_{i=1}^{\ell} v_i$  denote their concatenation.

By the following observation, when proving a lower bound for a compression of size  $\Theta(N^\gamma)$ , the main task is to prove the upper bound  $n = O(N^\gamma)$ ; the lower bound  $n = \Omega(N^\gamma)$  can be ensured mechanically.

**Observation A.1.** *Let  $0 \leq \gamma \leq 1$ . Given two  $N$ -dimensional vectors  $u, v$  of compressed size  $O(N^\gamma)$ , we can compute two  $O(N)$ -dimensional vectors  $u', v'$  of compressed size  $\Theta(N^\gamma)$  with the same inner product.*

*Proof.* Append  $0^{N^\gamma}$  using  $\Theta(N^\gamma)$  additional rules to the encodings of  $u$  and  $v$ . □

**The Strong  $k$ SUM Assumption** To generalize the lower bound of Theorem 1.1 so that it works for an arbitrary relationship between compressed and uncompressed sizes, we will use an assumption about a generalized version of 3SUM.

**Definition A.2** (The  $k$ SUM Problem). *Given  $k$  sets  $A_1, \dots, A_k$  of  $m$  integers in  $\{1, \dots, U\}$ , decide if there are  $k$  numbers  $a_1 \in A_1, \dots, a_k \in A_k$  such that  $a_1 + \dots + a_{k-1} = a_k$ .*

For all constant  $k \geq 3$  a simple meet-in-the-middle algorithm with hashing solves  $k$ SUM in  $O(m^{\lceil k/2 \rceil})$  time, and no faster algorithm by  $m^\varepsilon$  factors, for any  $\varepsilon > 0$ , is known to date, unless the universe size  $U$  is smaller than  $O(m^{\lceil k/2 \rceil - \varepsilon})$ . This is because Fast Fourier Transform gives an  $O(m + kU \log U)$  time algorithm [27]. It is conjectured that substantially faster algorithms do not exist (e.g. in [4, 2]).

*The Strong  $k$ SUM Conjecture.* For all constant  $k \geq 3$  it holds that: no algorithm can solve the  $k$ SUM problem with  $U = O(m^{\lceil k/2 \rceil})$  in  $O(m^{\lceil k/2 \rceil - \varepsilon})$  time, where  $\varepsilon > 0$ .

Observe that this assumption is about all  $k \geq 3$  and therefore implies the Strong 3SUM conjecture as a special case. Intuitively, the reason this problem helps us give reductions where the vectors are much more compressible is that, compared to 3SUM, as  $k$  grows the ratio between the time complexity  $m^{k/2}$  and the input size  $m$  grows.

## B Vector Inner Product

In this section, we prove the generalization of the lower bound of Theorem 1.1 to arbitrary relationships between compressed and uncompressed sizes of the vectors.

**Theorem B.1.** *Let  $0 < \varepsilon < 1/3$ . Assuming the Strong  $k$ SUM conjecture for all constant  $k$ , the inner product of two  $N$ -dimensional vectors that are grammar-compressed to size  $n = \Theta(N^\varepsilon)$  cannot be computed in  $O(N^{1/3-\delta})$  time, where  $\delta > 0$ .*

This result follows from the following stronger statement.

**Theorem B.2.** *Let  $k \geq 3$ . Assuming the Strong  $k$ SUM conjecture, the inner product of two  $N$ -dimensional vectors that are grammar-compressed to size  $n = \Theta(N^{1/\lceil \frac{3k-4}{2} \rceil})$  cannot be computed in  $O(N^{(1/3+\gamma_k)-\delta})$  time, where  $\delta > 0$  and*

$$\gamma_k := \begin{cases} \frac{2}{3(k-1)}, & \text{if } k \text{ is odd,} \\ \frac{4}{9k-12}, & \text{if } k \text{ is even.} \end{cases}$$

Observe that the above statement implies Theorem B.1: For any  $0 < \varepsilon < 1/3$ , we choose  $k$  sufficiently large such that  $1/\lceil \frac{3k-4}{2} \rceil < \varepsilon$ . Then using Observation A.1, we obtain that any  $O(N^{1/3-\delta})$ -time algorithm for Vector Inner Product with compressed size  $n = \Theta(N^\varepsilon)$  would give an  $O(N^{1/3+\gamma_k-\delta'})$ -time algorithm for Vector Inner Product with compressed size  $O(N^{1/\lceil \frac{3k-4}{2} \rceil}) = O(N^\varepsilon)$ , where  $\delta' = \gamma_k + \delta$  – this would refute the Strong  $k$ SUM conjecture by Theorem B.2.

Furthermore, observe that if we set  $k = 3$ , we obtain a  $\tilde{\Omega}(N^{2/3})$  lower bound for compressed size  $n = \Theta(N^{1/3})$  under the Strong 3SUM conjecture.

In the remainder of this section, we give the proof of Theorem B.2. The central construction is captured by the following lemma.

**Lemma B.3.** *Given sets  $A_1, \dots, A_k$  of integers in  $\{1, \dots, U\}$ , we define*

$$v'_{A_1+\dots+A_{k-1}} := \bigcirc_{\substack{(a_1, \dots, a_{k-2}) \in A_1 \times \dots \times A_{k-2} \\ \text{in lexicographic order}}} 0^{a_1+\dots+a_{k-2}} v_{A_{k-1}} 0^{(k-2)U-a_1-\dots-a_{k-2}},$$

$$v'_{A_k} := (v_{A_k} 0^{(k-2)U})^{m^{k-2}},$$

where  $v_{A_{k-1}}, v_{A_k} \in \{0, 1\}^U$  denote the characteristic vectors of the sets  $A_{k-1}, A_k$ . We have the following properties:

1. The inner product of the  $m^{k-2}(k-1)U$ -dimensional vectors  $v'_{A_1+\dots+A_{k-1}}$  and  $v'_{A_k}$  is nonzero if and only if there is a tuple  $(a_1, \dots, a_k) \in A_1 \times \dots \times A_k$  with  $a_1 + \dots + a_{k-1} = a_k$ .
2. We can compute compressions of  $v'_{A_1+\dots+A_{k-1}}, v'_{A_k}$  of size  $O(km \log U) = O(m \log U)$  in time  $O(m \log U)$ .

*Proof.* For 1., observe that by construction,  $v'_{A_1+\dots+A_{k-1}}$  and  $v'_{A_k}$  consist of  $m^{k-2}$  blocks, indexed by  $(a_1, \dots, a_{k-2}) \in A_1 \times \dots \times A_{k-2}$  and consisting of the sequence  $0^{a_1+\dots+a_{k-2}} v_{A_{k-1}} 0^{(k-2)U-a_1-\dots-a_{k-2}}$  and  $v_{A_k} 0^{(k-2)U}$  of length  $(k-1)U$ , respectively. In particular, in block  $(a_1, \dots, a_{k-2})$  there is a common 1-entry  $t$  if and only if  $t = (a_1 + a_2 + \dots + a_{k-2}) + a$  for some  $a \in A_{k-1}$  and  $t = a'$  for some  $a' \in A_k$ . Thus, there exists a common 1-entry in  $v'_{A_1+\dots+A_{k-1}}$  and  $v'_{A_k}$  if and only if there are  $(a_1, \dots, a_k) \in A_1 \times \dots \times A_k$  with  $a_1 + \dots + a_{k-1} = a_k$ .

For 2., we first recall that as shown in the proof of Theorem 1.1, we can compute a compression of the characteristic vectors  $v_{A_{k-1}}$  and  $v_{A_k}$  of size  $O(m \log U)$  in time  $O(m \log U)$ . Thus, using Proposition 2.1, we can compute a compression of  $v'_{A_k} = (v_{A_k} 0^{(k-2)U})^{m^{k-2}}$  of size  $O(m \log U) + O(\log((k-2)U)) + O(\log m^{k-2}) = O(m \log U)$  in time  $O(m \log U)$ . To show the claim for  $v'_{A_1+\dots+A_{k-1}}$ , we proceed inductively and construct the strings  $v'_{A_{k-1}} := v_{A_{k-1}}$  and

$$v'_{A_i+\dots+A_{k-1}} := \bigcirc_{\substack{(a_i, \dots, a_{k-2}) \in A_i \times \dots \times A_{k-2} \\ \text{in lexicographic order}}} 0^{a_i+\dots+a_{k-2}} v_{A_{k-1}} 0^{(k-1-i)U-a_i-\dots-a_{k-2}},$$

for  $i = k-2, \dots, 1$ . The central observation is that we can write  $A_i = \{a_1^{(i)}, \dots, a_m^{(i)}\}$  with  $a_1^{(i)} < a_2^{(i)} < \dots < a_m^{(i)}$  and obtain

$$v'_{A_i+\dots+A_{k-1}} = \bigcirc_{j=1}^m 0^{a_j^{(i)}} v'_{A_{i+1}+\dots+A_{k-1}} 0^{U-a_j^{(i)}}.$$

Thus, given an SLP  $\mathcal{G}_{i+1}$  for  $v'_{A_{i+1}+\dots+A_{k-1}}$  with starting symbol  $S_{i+1}$ , we can give an SLP  $\mathcal{G}_i$  for  $v'_{A_i+\dots+A_{k-1}}$  of size  $|\mathcal{G}_{i+1}| + O(m \log U)$  as follows: For each  $j = 1, \dots, m$ , we encode  $0^{a_j^{(i)}}$  using  $O(\log a_j^{(i)}) = O(\log U)$  additional symbols, re-use  $S_{i+1}$  to generate  $v'_{A_{i+1}+\dots+A_{k-1}}$ , and encode  $0^{U-a_j^{(i)}}$  using  $O(\log(U - a_j^{(i)})) = O(\log U)$  additional symbols. Observe that we can obtain this compression in time  $O(m \log U)$ .

Thus, starting from an SLP for  $v'_{A_{k-1}}$ , after  $k-2$  steps we obtain an SLP  $\mathcal{G}_1$  for  $v'_{A_1+\dots+A_{k-1}}$  of size  $O(km \log U) = O(m \log U)$ . The running time of this construction is  $O(km \log U) = O(m \log U)$ , concluding the proof.  $\square$

Let  $A_1, \dots, A_k \subseteq \{1, \dots, U\}$  be a Strong  $k$ SUM instance, i.e.,  $U = O(m^{\lceil k/2 \rceil})$ . The reduction given in Lemma B.3 gives two vectors  $v, v'$  of dimension  $m^{k-2} \cdot (k-1)U$  such that their inner product allows us to decide the  $k$ SUM instance. Furthermore, the vectors have a compressed size of  $O(m \log U)$ .

We slightly adapt  $v, v'$  by appending 0's to increase the dimension slightly to  $N = m^{k-2} \cdot (k-1)U \log^{\lceil (3k-4)/2 \rceil} U$  (this does not change their inner product). We verify the following facts: (1) an  $O(N^{1/3+\gamma_k-\delta})$ -time Vector Inner Product algorithm for some  $\delta > 0$  refutes the Strong  $k$ SUM

conjecture and (2)  $n = O(N^{1/\lceil \frac{3k-4}{2} \rceil})$ . Using Observation A.1, this concludes the proof of Theorem B.2.

For (1), consider first the case that  $k$  is odd. Then  $U = O(m^{(k+1)/2})$  and  $N = O(m^{k-2}U \text{polylog}U) = O(m^{3(k-1)/2} \text{polylog}m)$ . Observe that

$$\begin{aligned} N^{1/3+\gamma_k-\delta} &= O(m^{\frac{3(k-1)}{2} \cdot (\frac{1}{3} + \frac{2}{3(k-1)} - \delta)} \text{polylog}m) \\ &= O(m^{\frac{k-1}{2} + 1 - \frac{3(k-1)}{2}\delta}) = O(m^{\lceil \frac{k}{2} \rceil - \delta'}), \end{aligned}$$

for any  $0 < \delta' < 3(k-1)\delta/2$ .

Similarly, for even  $k$ , we have  $U = O(m^{k/2})$  and  $N = O(m^{k-2}U \text{polylog}U) = O(m^{(3k-4)/2} \text{polylog}m)$ . Using  $1/3 + \gamma_k = 1/3 + 4/(9k-12) = k/(3k-4)$ , we obtain that

$$N^{1/3+\gamma_k-\delta} = O(m^{\frac{3k-4}{2} \cdot (\frac{k}{3k-4} - \delta)} \text{polylog}m) = O(m^{\frac{k}{2} - \delta'}),$$

for any  $0 < \delta' < (3k-4)\delta/2$ . Thus, in both cases, an  $O(N^{1/3+\gamma_k-\delta})$ -time Vector Inner Product algorithm refutes the Strong  $k$ SUM conjecture by solving the given  $k$ SUM instance in time  $O(m^{\lceil k/2 \rceil - \delta'})$  with  $\delta' > 0$ .

Finally, for (2), note that  $N = O(m^{k-2}U \log^{\lceil (3k-4)/2 \rceil} U) = O(m^{\lceil (3k-4)/2 \rceil} \log^{\lceil (3k-4)/2 \rceil} m)$ . Thus  $n = O(m \log m) = O(N^{1/\lceil (3k-4)/2 \rceil})$ , as desired.

## C Matrix-Vector Product

In this section we provide the full proof of Theorem 1.2. We first prove a self-reduction for 3SUM as a central tool (using standard techniques), and then proceed to give the final reduction.

### C.1 Proof of the Self-Reduction

Let us restate Lemma 4.1.

**Lemma C.1** (Self-Reduction for 3SUM). *Let  $1 \leq s = s(m) \leq m$  and  $\varepsilon > 0$  be arbitrary. If there is an algorithm that, given a target  $t$  and  $L = O((m/s)^2)$  sets  $A_\ell, B_\ell, C_\ell$  of  $s$  integers in  $\{1, \dots, O(s^3 \log^2 s)\}$ , determines for all  $1 \leq \ell \leq L$  whether there are  $a \in A_\ell, b \in B_\ell, c \in C_\ell$  with  $a + b + c = t$  in total time  $O(m^{2-\varepsilon})$ , then the 3SUM conjecture is false.*

In the remainder of this section, we give the proof.

Let  $A, B, C$  be sets of  $m$  integers in  $\{1, \dots, U\}$ . We use a couple of results from earlier work that are stated for the following 3SUM formulation: given three sets  $A', B', C'$  of  $m$  integers in  $\{-U, \dots, U\}$  with  $U = O(m^3 \log^2 m)$ , we are asked to determine whether there are  $a \in A', b \in B', c \in C'$  such that  $a + b + c = 0$ . We first reduce our formulation to this formulation by setting  $A' := A, B' := B$ , and  $C' := -C = \{-c \mid c \in C\}$ . We can now use the following known self-reduction for 3SUM.

**Lemma C.2** (Reformulated from [62, Theorem 13]). *Let  $s := s(m)$  with  $1 \leq s \leq m$ . Given three sets  $A', B', C'$  of  $m$  integers in  $\{-U, \dots, U\}$ , we can compute, in time  $O(m^2/s)$ , a list of  $L = O((m/s)^2)$  3SUM instances, i.e., sets  $A'_\ell, B'_\ell, C'_\ell$  with  $1 \leq \ell \leq L$ , such that there is an  $a \in A', b \in B', c \in C'$  with  $a + b + c = 0$  if and only if there is an instance  $1 \leq \ell \leq L$  and a triple  $a \in A'_\ell, b \in B'_\ell, c \in C'_\ell$  with  $a + b + c = 0$ . Furthermore, each  $A'_\ell, B'_\ell, C'_\ell$  is a subset of  $s$  integers of  $A', B', C'$ , respectively.*

*Proofsketch.* We give the high-level arguments (for details, see the proof of Theorem 13 in [62]). For a set  $S$ , let  $\min S$  and  $\max S$  denote the smallest and largest element in  $S$ , respectively. We sort  $A', B', C'$  and split each array into  $\lceil m/s \rceil$  consecutive parts  $A'_1, \dots, A'_{\lceil m/s \rceil}, B'_1, \dots, B'_{\lceil m/s \rceil}, C'_1, \dots, C'_{\lceil m/s \rceil}$ , each of at most  $s$  elements, such that  $\max A'_i < \min A'_{i+1}, \max B'_i < \min B'_{i+1}$  and  $\max C'_i < \min C'_{i+1}$  for all  $i$ . Instead of searching for a 3SUM triple  $a \in A'_i, b \in B'_j, c \in C'_k$  for each  $1 \leq i, j, k \leq \lceil m/s \rceil$  (i.e.,  $\Theta((m/s)^3)$  subproblems with  $s$  elements each), one observes that most subproblems can be trivially solved: We say that a subproblem  $(i, j, k)$  is trivial, if  $\min A_i + \min B_j + \min C_k > 0$  or  $\max A_i + \max B_j + \max C_k < 0$ ;

these subproblems cannot contain a solution. The key insight is that there are at most  $O((m/s)^2)$  non-trivial subproblems (which follows since the *domination* partial ordering on  $\{1, \dots, u\}^3$  has at most  $O(u^2)$  incomparable elements); these can be determined in time  $O((m/s)^2)$ . Thus, it suffices to list all  $O((m/s)^2)$  non-trivial subproblems with  $s$  integers in each set in time  $O(m^2/s)$ .  $\square$

The resulting instances  $A'_\ell, B'_\ell, C'_\ell$  consist of integers in  $\{-U, \dots, U\}$  with large universe size  $U = O(m^3 \log^2 m)$ . We reduce the universe size to  $O(s^3 \log^2 s)$  using a folklore technique (a slightly stronger result with  $U = O(s^3)$  can be achieved using the techniques of [15]). To prepare notation, for any set  $S$ , we let  $S \bmod p := \{s \bmod p \mid s \in S\}$ .

**Lemma C.3** (Adaptation of [5, Lemma B.1]). *There is some  $\alpha$  such that  $U' := \alpha s^3 \log s \log U$  satisfies the following property: Let  $A, B, C$  be sets of  $s$  integers in  $\{-U, \dots, U\}$  such that no  $a \in A, b \in B, c \in C$  satisfies  $a + b + c = 0$ . Let  $p$  be a prime chosen uniformly at random from  $\{2, \dots, U'\}$ . Then the probability that there are  $a_p \in A \bmod p, b_p \in B \bmod p, c_p \in C \bmod p$  with  $a_p + b_p + c_p \equiv 0 \pmod{p}$  is at most  $1/2$ .*

*Proof.* Let  $a \in A, b \in B, c \in C$  be arbitrary. Since  $a + b + c \neq 0$ , note that  $(a \bmod p) + (b \bmod p) + (c \bmod p) \equiv 0 \pmod{p}$  if and only if  $p$  divides  $a + b + c$ . Since  $a + b + c \in \{-3U, \dots, 3U\}$ ,  $a + b + c$  has at most  $\log_2(3U)$  prime factors. Let  $P$  denote the number of prime numbers in  $\{2, \dots, U'\}$ ; by the prime number theorem we can choose  $\alpha$  large enough such that  $P \geq 2s^3 \log_2(3U)$ . Thus, the probability that  $p$  was chosen among these at most  $\log_2(3U)$  prime factors is at most  $\log_2(3U)/P \leq 1/(2s^3)$ . Thus, by a union bound over all  $s^3$  triples  $a \in A, b \in B, c \in C$ , the probability that there are  $a_p \in A \bmod p, b_p \in B \bmod p, c_p \in C \bmod p$  with  $a + b + c \equiv 0 \pmod{p}$  is at most  $1/2$ .  $\square$

Note that if  $A, B, C$  contain a triple  $a, b, c$  with  $a + b + c = 0$ , then also  $A \bmod p, B \bmod p, C \bmod p$  contain a triple  $a_p, b_p, c_p$  with  $a_p + b_p + c_p \equiv 0 \pmod{p}$  for any  $p$ .

We can finally prove Lemma C.1: Assume that there is an algorithm  $\mathcal{A}$  that given a target  $t$  and  $L = O((m/s)^2)$  instances  $A_\ell, B_\ell, C_\ell, 1 \leq \ell \leq L$  of  $s$  integers in  $\{1, \dots, U'\}$ , determines for all  $1 \leq \ell \leq L$  whether there are  $a \in A_\ell, b \in B_\ell, c \in C_\ell$  with  $a + b + c = t$  in total time  $O(m^{2-\varepsilon})$  with  $\varepsilon > 0$ . Observe that since  $\mathcal{A}$  runs in time  $O(m^{2-\varepsilon})$ , we must have  $s = \Omega(m^\varepsilon)$ , since otherwise already the size of the input to  $\mathcal{A}$  of  $\Theta(m^2/s)$  would be  $\omega(m^{2-\varepsilon})$ . Thus, we have  $U' = O(s^3 \log^2 s)$ .

For  $r = 1, \dots, \gamma \log m$  many repetitions, we do the following: We choose a random prime  $p_r \in [2, U']$  and obtain  $\ell$  instances in  $\{0, \dots, p_r - 1\} \subseteq \{0, \dots, U\}$  by taking the sets modulo  $p_r$ , i.e.,  $A_\ell^{(r)} := A'_\ell \bmod p_r, B_\ell^{(r)} := B'_\ell \bmod p_r$ , and  $C_\ell^{(r)} = C'_\ell \bmod p_r$ . Observe that we may determine whether there is some  $a \in A_\ell^{(r)}, b \in B_\ell^{(r)}, c \in C_\ell^{(r)}$  with  $a + b + c \equiv 0 \pmod{p_r}$  by testing for each  $t \in \{0, p_r, 2p_r\}$ , whether there are  $a \in A_\ell^{(r)}, b \in B_\ell^{(r)}, c \in C_\ell^{(r)}$  with  $a + b + c = t$ . Thus, to do this, and additionally ensure that each integer is in  $\{1, \dots, U'\}$ , we add 1 to each integer in  $A_\ell^{(r)}, B_\ell^{(r)}, C_\ell^{(r)}$  and for each  $\lambda \in \{0, 1, 2\}$ , call  $\mathcal{A}$  on the sets  $A_\ell^{(r)}, B_\ell^{(r)}, C_\ell^{(r)}, 1 \leq \ell \leq L$  with common target  $t_\lambda := 3 + \lambda p_r$ .

Observe that after these  $3\gamma \log m$  calls to  $\mathcal{A}$ , we know for each  $1 \leq \ell \leq L$  and  $1 \leq r \leq \gamma \log m$  whether there are  $a \in A'_\ell, b \in B'_\ell, c \in C'_\ell$  with  $a + b + c \equiv 0 \pmod{p_r}$ . We declare our original 3SUM instance  $A, B, C$  to be a YES instance if and only if there is some  $\ell$  such that for all  $r$  we have found a witness  $a \in A'_\ell, b \in B'_\ell, c \in C'_\ell$  with  $a + b + c \equiv 0 \pmod{p_r}$ . Note that if  $A, B, C$  is a YES instance, we always return YES by Lemma C.2. Otherwise, if  $A, B, C$  is a NO instance, consider a fixed  $\ell$ . By Lemmas C.2 and C.3, the probability that for all  $r$ , we find  $a \in A'_\ell, b \in B'_\ell, c \in C'_\ell$  with  $a + b + c \equiv 0 \pmod{p_r}$  is bounded by  $2^{-\gamma \log m} = m^{-\gamma}$ . Thus, by a union bound over all  $\ell$ , the probability that we incorrectly return YES in this case is at most  $Lm^{-\gamma} = O((m/s)^2 m^{-\gamma}) = O(m^{2-\gamma})$ . We can make this error probability polynomially small by choosing  $\gamma > 2$ .

Observe that the running time of the above process is  $O(\log m)$  times the running time of  $\mathcal{A}$  (note that the running time used for Lemma C.2 is linear in its output size, which is the input size of  $\mathcal{A}$  and thus dominated by the running time of  $\mathcal{A}$ ). Thus, we can solve any 3SUM instance in time  $O(m^{2-\varepsilon} \log m)$ , which would refute the 3SUM conjecture. This concludes the proof of Lemma C.1.

## C.2 Main Reduction for Matrix-Vector Multiplication

We now turn to the proof of Theorem 1.2.

*Proof.* Let  $s$  be a parameter to be chosen later. By Lemma 4.1, it suffices to solve  $L = O((m/s)^2)$  3SUM instances  $A_\ell, B_\ell, C_\ell$  consisting of  $s$  integers in  $\{1, \dots, U\}$ ,  $U = O(s^3 \log^2 s)$  with common target  $1 \leq t \leq 3U$  in time  $O(m^{2-\epsilon})$  for some  $\epsilon > 0$  to contradict the 3SUM conjecture.

We construct an  $(L \times 3s^2U)$  matrix  $M$  and  $v \in \{0, 1\}^{3s^2U}$  as follows. Intuitively, each row  $M_\ell$  and the vector  $v$  are partitioned into  $s^2$  blocks of size  $3U$ . Each block is indexed by  $(i, j)$  with  $i, j \in \{1, \dots, s\}$  in lexicographic order and the block of  $M_\ell$  corresponding to  $(i, j)$  encodes the characteristic vector of the set  $a_i + b_j + C_\ell = \{a_i + b_j + c \mid c \in C_\ell\} \subseteq \{1, \dots, 3U\}$ , where  $a_i$  is the  $i$ -th integer in  $A_\ell$  and  $b_j$  is the  $j$ -th integer in  $B_\ell$ . Correspondingly, every block  $(i, j)$  in  $v$  encodes the characteristic vector of the singleton set  $\{t\} \subseteq \{1, \dots, 3U\}$ . Thus, there is a position in block  $(i, j)$  in which both  $M_\ell$  and  $v$  have a 1 if and only if there is a  $c \in C_\ell$  such that  $a_i + b_j + c = t$ .

Formally, for any  $1 \leq \ell \leq L$ , we write  $A_\ell = \{a_1^\ell, \dots, a_s^\ell\}$ ,  $B_\ell = \{b_1^\ell, \dots, b_s^\ell\}$  and define

$$\begin{aligned} M_\ell &:= \underbrace{0^{a_1+b_1} v_{C_\ell} 0^{3U-a_1-a_2}}_{v_{a_1^\ell+b_1^\ell+C_\ell}} \dots \underbrace{0^{a_i+b_j} v_{C_\ell} 0^{3U-a_i-b_j}}_{v_{a_i^\ell+b_j^\ell+C_\ell}} \dots \underbrace{0^{a_s+b_s} v_{C_\ell} 0^{3U-a_s-b_s}}_{v_{a_s^\ell+b_s^\ell+C_\ell}}, \\ v &:= 0^{t-1} 10^{3U-t} \dots 0^{t-1} 10^{3U-t} \dots 0^{t-1} 10^{3U-t}, \end{aligned}$$

where  $v_{C_\ell} \in \{0, 1\}^U$  denotes the characteristic vector of  $C_\ell$ . By this structure, it is clear that  $M_\ell v \geq 1$  if and only if there are  $a \in A_\ell, b \in B_\ell, c \in C_\ell$  with  $a + b + c = t$ .

We will show that each row  $M_\ell$  can be compressed to size  $\Theta(s \log s)$  (as opposed to its RLE of length  $\Theta(s^3 \log s)$ ). We thus will set  $N = \lceil 3s^2U \log^3 s \rceil = \Theta(s^5 \log^5 s)$ , and append  $0^{N-3s^2U}$  to each row  $M_\ell$  and  $v$ , so that we obtain an  $L \times N$  matrix  $M'$  and  $N$ -dimensional vector  $v'$  whose product  $M'v'$  can be used to solve all instances  $A_\ell, B_\ell, C_\ell$  in linear time. Observe that each row has a compression of size  $\Theta(N^{1/5}) = \Theta(s \log s)$ , as desired. Since  $L = O((m/s)^2)$  and  $N \geq s^5$ , we can set  $s = \Theta(m^{2/7})$  such that  $L \leq N$  (we can indeed make  $L = N$  by introducing zero rows, if necessary). Thus, an  $O(Nn^{2-\epsilon})$ -time algorithm for multiplying  $M'$  and  $v'$  would solve all  $L$  3SUM instances in time

$$O(Nn^{2-\epsilon}) = O((m/s)^2 (s \log s)^{2-\epsilon}) = O((m^2/s^\epsilon) \text{polylog } s) = O(m^{2-\frac{2}{7}\epsilon} \text{polylog } m),$$

which would refute the 3SUM conjecture.

Analogous to the proof of Theorems 1.1 and B.2, we can compute a compression of size  $\Theta(s \log s)$  in time  $O(s \log s)$ . Indeed, for each  $M_\ell$ , this already follows from Lemma B.3 when setting  $A_1 := A_\ell, A_2 := B_\ell, A_3 := C_\ell$ , which shows how to compress the string  $v'_{A_1+A_2+A_3} = M_\ell$  to size  $O(s \log U) = O(s \log s)$  in time  $O(s \log U) = O(s \log s)$ . For  $v$ , we simply apply Proposition 2.1 to the straightforward compression of  $0^{t-1} 10^{3U-t}$  to size  $O(\log U)$ , which leads to a compression of  $v$  of size  $O(\log U + \log s) = O(\log s)$ . Using Observation A.1, we can make all encodings have size  $\Theta(s \log s)$ , which concludes the proof.  $\square$

## D Matrix-Matrix Product

In this section, we give the full proof of Theorem 5.1.

*Proof of Theorem 5.1.* Let  $\ell \in \mathbb{N}$ . We first define the matrices  $A', B'$  where  $A'$  is a  $(2^\ell \times 2\ell)$  matrix with rows indexed by strings  $x \in \{0, 1\}^\ell$  in lexicographic order, and  $B'$  is a  $(2\ell \times 2^\ell(2\ell))$  matrix with columns indexed by  $(y, k) \in \{0, 1\}^\ell \times \{1, \dots, 2\ell\}$  in lexicographic order. For arbitrary  $z \in \{0, 1\}^\ell$ , let  $\text{diag}(z)$  denote the  $\ell \times \ell$  diagonal matrix with  $z$  on the diagonal. We define

$$A'_x := (x \mid 1^\ell), \quad B'_{(y,1), \dots, (y,2\ell)} := \left( \begin{array}{c|c} \text{diag}(1^\ell) & 0 \\ \hline 0 & \text{diag}(y) \end{array} \right).$$

Let  $C' = A'B'$  be the  $(2^\ell \times 2^\ell(2\ell))$  product matrix of  $A'$  and  $B'$ , with rows and columns indexed by  $\{0, 1\}^\ell$  and  $\{0, 1\}^\ell \times \{1, \dots, 2\ell\}$ , respectively. Observe that by definition,  $(C_{x,(y,1)}, \dots, C_{x,(y,2\ell)}) = (x | y)$  for any  $x, y \in \{0, 1\}^\ell$ . In particular, when we view  $C'$  as a  $2^{2\ell}(2\ell)$ -length string, it contains all strings in  $\{0, 1\}^{2\ell}$  as substrings, thus by Lemma 5.2, any row-wise compression is of size at least  $2^{2\ell}/(2\ell)$ .

To also ensure column-wise incompressibility, we slightly extend the construction by analogous transposed constructions: We let  $N := 2^\ell(2\ell + 1)$  and define the final  $(N \times N)$  matrices  $A, B$  as follows:

$$A := \left( \begin{array}{c|c|c} A' & 0 & 0 \\ \hline 0 & B'^T & 0 \end{array} \right), \quad B := \left( \begin{array}{c|c} B' & 0 \\ \hline 0 & A'^T \\ \hline 0 & 0 \end{array} \right).$$

Since  $C := AB = \left( \begin{array}{c|c} A'B' & 0 \\ \hline 0 & (A'B')^T \end{array} \right)$  contains all length- $(2\ell)$  strings as substrings of the rows (in the  $A'B'$  part) and as substrings of the columns (in the  $(A'B')^T$  part), any strong compression of  $C$  is of size at least  $2^{2\ell}/(2\ell) = \Omega(N/\log^2 N)$ , proving the third part of the claim.

For the first two parts, it remains to show that  $A$  and  $B$  can be well compressed: For the convenient compression, we observe that any row in  $A$  is either of the form  $(x1^\ell | 0^{2\ell} | 0^{N-4\ell})$ , which has a RLE of length at most  $|x1^\ell| + O(\log N) = O(\log N)$ , or it is of the form  $(0^{2\ell} | 0^{i-1}\alpha 0^{2\ell-i} | 0^{N-4\ell})$  for some  $\alpha \in \{0, 1\}, i \in \{1, \dots, 2\ell\}$ , which also has a RLE of length at most  $O(\log N)$ . Thus, each of the  $N$  rows of  $A$  can be compressed to size  $O(\log N)$ , as desired. By a symmetric statement, also each column of  $B$  has a RLE of size  $O(\log N)$ .

Finally, for the strong compression, we show that we compress  $A^T$  when viewed as a string, i.e., we compress the concatenation of the columns of  $A$ . The main insight is the following: Imagine a binary  $\ell$ -bit counter. Using grammar compression, we can compress the sequence of values of any fixed bit while the counter counts from 0 to  $2^\ell - 1$  in size  $O(\ell)$ . Formally, let  $G_0, G_1$  be grammar compressions of strings  $s_0, s_1$ . For any  $1 \leq i \leq \ell$ , we can encode  $(s_0^{2^{\ell-i}} s_1^{2^{\ell-i}})^{2^{i-1}}$  using only  $O(\ell)$  additional non-terminals in the canonical way. Specifically, using  $O(\ell - i)$  new symbols, we may encode  $s_0^{2^{\ell-i}} s_1^{2^{\ell-i}}$ ; let  $\tilde{S}$  denote the corresponding non-terminal. We then encode  $\tilde{S}^{2^{i-1}}$  using  $O(i)$  additional new symbols. In total, we only need  $O((\ell - i) + i) = O(\ell)$  additional symbols, as desired.

We apply the above idea to encode the concatenation all columns of  $A$  as follows: Consider column  $i$ .

- For  $1 \leq i \leq \ell$ , then by the chosen lexicographic order of the row indices  $x \in \{0, 1\}^\ell$  of  $A'$ , note that the  $i$ -th column of  $A$  is of the form  $(0^{2^{\ell-i}} 1^{2^{\ell-i}})^{2^{i-1}} | 0^{N-2^\ell}$ . Using the above analysis, we can compress it to size  $O(\ell) + O(\log N) = O(\log N)$ .
- If  $\ell + 1 \leq i \leq 2\ell$ , the  $i$ -th column is of the form  $1^{2^\ell} | 0^{N-2^\ell}$ , which we can compress to size  $O(\log \ell + \log N) = O(\log N)$ .
- If  $2\ell + 1 \leq i \leq 3\ell$ , write  $i = 2\ell + i'$  and observe that the  $i$ -th column of  $A$  is of the form  $0^{2^\ell} | (0^{i'-1} 10^{\ell-i'})^{2^\ell}$ . Using  $O(\ell)$  non-terminals to encode  $0^{i'-1} 10^{\ell-i'}$ , it is immediate that we can compress the complete column using  $O(\ell)$  additional non-terminals, i.e., yielding a total of  $O(\ell) = O(\log N)$ .
- If  $3\ell + 1 \leq i \leq 4\ell$ , write  $i = 3\ell + i'$  and observe that by the chosen lexicographic order of the column indices  $(y, k) \in \{0, 1\}^\ell \times \{1, \dots, 2\ell\}$  of  $B'$ , the  $i$ -th column of  $A$  is of the form  $0^{2^\ell} | (s_0^{2^{\ell-i'}} s_1^{2^{\ell-i'}})^{2^{i'-1}}$  where  $s_\alpha := 0^{i'-1} \alpha 1^{\ell-i'}$ . We can give trivial grammars of size  $O(\ell)$  for  $s_0, s_1$ . Then, by the above analysis, we only need  $O(\ell)$  additional non-terminals for the counter-like part. In total, we only need  $O(\ell) = O(\log N)$  non-terminals to encode the  $i$ -th column.
- Finally, observe that the remaining columns  $i = 4\ell + 1, \dots, N$  consist of  $(N - 4\ell)N$  zeroes, which we can encode together using only  $O(\log N)$  non-terminals.

In summary, we can encode the first  $4\ell$  columns using  $O(\log N)$  non-terminals each, and only  $O(\log N)$  non-terminals for the remaining columns, so we can fully compress the concatenation of  $A$ 's columns to size  $O(\log^2 N)$ , as claimed.  $\square$
